# Supplementary material for: Changes in Stress-Mediated Markers in a Human Cardiomyocyte Cell Line under Hyperglycemia
Source: MDPI journal article supplement (doi:10.3390/ijms221910802), 2021-10-07
Supplement: s1 [file s1]

**Suppl. Fig.1.**

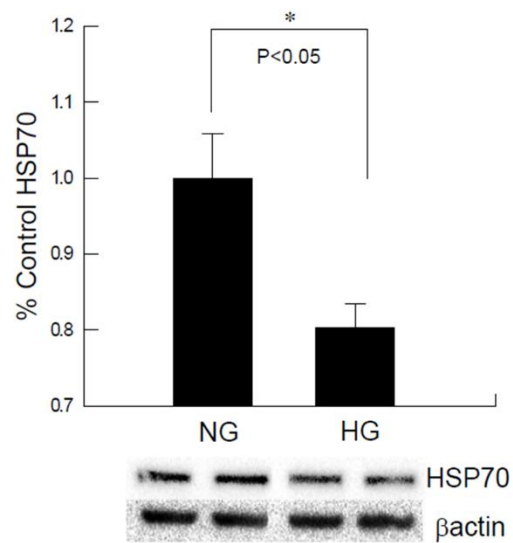

**Suppl. Fig.1. Hyperglycemic insult in cardiomyocytes reduces HSP70 expression.** (a) Western blot analysis of AC16 cardiomyocytes following hyperglycemic insult for 48 hours showed a decrease in the expression of HSP70 as compared to cells exposed to normal glucose (NG).
